# Supplementary material for: Astrocyte-Specific Genes Are Generally Demethylated in Neural Precursor Cells Prior to Astrocytic Differentiation
Source: PLoS One. 2008 Sep 11;3(9):e3189. doi: 10.1371/journal.pone.0003189 (PMC2527128; doi:10.1371/journal.pone.0003189)
Supplement: Table S1 — Genome-wide profiling of DNA methylation. Hypomethylated and hypermethylated genes in E14.5 NPCs and astrocytes compared to E11.5 NPCs. Each row indicates each probe. Probes with methylation changes are indicated by color as in Fig. 1A. (0.06 MB XLS) [file pone.0003189.s001.xls]

## Sheet: Data
Hypomethylated
Probe name	GeneSymbol	Pos	E14.5NPCs	Astrocytes
A_68_P14012051	Cidea	-7847
A_68_P12282038	Wisp1	-7804
A_68_P06060862	Rab6ip1	-7693
A_68_P09372217	Cdrt4	-7370
A_68_P05714306	Bcl2l14	-7351
A_68_P02400626	Nfkb1	-7332
A_68_P02844641	Elf2	-7285
A_68_P03738139	chr4:062496685-062496743	-7282
A_68_P03738134	chr4:062496417-062496466	-7009
A_68_P10147871	Rin3	-6807
A_68_P09389455	4933434M16Rik	-6609
A_68_P04775335	Ccl24	-6359
A_68_P02325572	Ntng1	-5960
A_68_P06950136	Angpt2	-5934
A_68_P10060189	1200009I06Rik	-5897
A_68_P01757589	1110002H13Rik-Adamtsl2	-5770
A_68_P04102241	Cxcl11	-5277
A_68_P06035802	Syt8	-4582
A_68_P06449638	Hif3a	-4321
A_68_P05591708	chr6:087058680-087058730	-4184
A_68_P06449634	Hif3a	-4047
A_68_P08034953	Plod2	-4011
A_68_P04055134	Clspn	-3881
A_68_P14420129	Ldb1	-3802
A_68_P12912543	Olig1	-3440
A_68_P07723900	Sema3f	-3381
A_68_P07161459	Mmp15	-3314
A_68_P08186347	Gcnt3	-3271
A_68_P03553862	chr4:141094612-141094657	-3164
A_68_P04238073	Grsf1	-3058
A_68_P04420388	Grsf1	-2549
A_68_P09165274	Nxn-Timm22	-2370
A_68_P09974111	Bdkrb1	-2258
A_68_P07830884	2410080H04Rik	-2179
A_68_P03633662	Padi2	-2114
A_68_P09713900	Fscn2	-1900
A_68_P13140353	Rhoq	-1796
A_68_P04590703	Stx1a	-1506
A_68_P03470238	Vwa1	-1489
A_68_P00529707	Nab1	-1431
A_68_P01734405	Fap	-1357
A_68_P01542522	Ghrh	-1336
A_68_P14359337	Cuedc2	-1195
A_68_P04623592	Actb	-1087
A_68_P13337340	Gtf2f1	-886
A_68_P04623593	Actb	-779
A_68_P14359346	Cuedc2	-732
A_68_P04397047	Sparcl1	-377
A_68_P09550803	Tnfsf13	-346
A_68_P08744512	5330420D20Rik	-217
A_68_P03185914	Enpep	-82
A_68_P11762025	Rnase13	-28
A_68_P07833554	4931406C07Rik-Josd3	-11
A_68_P11865049	Gpd1	46
A_68_P13145354	D17H6S56E-3	113
A_68_P02971300	Tm4sf1	125
A_68_P13556627	Cyp4f13	277
A_68_P09618749	Aldoc	361
A_68_P00216168	1500015O10Rik	364
A_68_P04516442	Drctnnb1a	463
A_68_P11470174	Ebi2	921
A_68_P07815600	Mbd3l2	1080
A_68_P00416360	Kcnj10	1245
A_68_P10735909	Hmgcr	1441
A_68_P02465751	Ddit4l	1542
A_68_P00458836	Rab17	1609
A_68_P01439553	A930018P22Rik	1911
A_68_P04341989	Mafk	1998
A_68_P08429178	Unc5b	-7714
A_68_P13117630	E130009J12Rik	-7584
A_68_P11967961	9330154K18Rik	-7360
A_68_P10344900	Evl	-7000
A_68_P13305471	Mrps18a	-6211
A_68_P09667861	Lif	-6127
A_68_P00303097	Lamc2	-5674
A_68_P04986385	Galnt9	-5494
A_68_P11855104	A930017M01Rik	-5466
A_68_P05461147	Znrf2	-5192
A_68_P12847233	Hes1	-4976
A_68_P12077884	BC030396	-4902
A_68_P05049344	Slc6a6	-4720
A_68_P08239474	Tacr2	-4694
A_68_P11528226	BC055107	-4155
A_68_P08450166	Bpil2-Fbxo7	-3565
A_68_P14014241	Dctn4	-3154
A_68_P09845387	Ppp1r13b	-3131
A_68_P01095208	mmu-mir-213	-2544
A_68_P06481071	Odf3	-2471
A_68_P12890514	mmu-mir-99a	-2244
A_68_P07729952	Amotl2	-1797
A_68_P03448382	Tnfsf8	-1601
A_68_P14251913	LOC114601	-1436
A_68_P03249619	Sync	-1327
A_68_P09124054	Gfap	-1293
A_68_P09277247	Cyb561	-1206
A_68_P13298042	Cbs	-1116
A_68_P01205640	Trp53rk	-947
A_68_P07518867	Chrna5	-843
A_68_P03417144	Gem	-662
A_68_P08223987	Wdr18	-568
A_68_P03499515	Hp1bp3	-498
A_68_P13123107	Tff2	-413
A_68_P15166371	Arhgef6	-370
A_68_P05148642	Mgp	-211
A_68_P08603176	Timeless	-153
A_68_P08205280	Scml4	-70
A_68_P09423391	Dhrs7c	-39
A_68_P00208772	Serpinb8	8
A_68_P11632581	Zfp395	230
A_68_P04189156	P2rx7	388
A_68_P11025261	Elmo1	497
A_68_P01238238	Pacsin3	578
A_68_P11885739	Ela1	624
A_68_P02676554	D830013H12	688
A_68_P02071789	Ptpra	771
A_68_P06441611	Mia1	781
A_68_P09605729	chr11:049885046-049885100	851
A_68_P09581503	Tax1bp3	868
A_68_P07274014	Orc6l	880
A_68_P08002166	Gldn	913
A_68_P13127671	Sox8	1070
A_68_P09313934	Caskin2	1194
A_68_P01993216	Ptpra	1198
A_68_P01238242	Pacsin3	1210
A_68_P08629268	Hkdc1	1262
A_68_P01781925	Thbs1	1324
A_68_P04318728	Pbp1	1685
A_68_P09804381	Siva	1687
A_68_P12942812	Zfp148	1749
A_68_P02084015	E2f1	1752
A_68_P09669754	Rad51l3	1803
A_68_P11041833	F2r	1925
A_68_P12410789	1810015C04Rik	-7452
A_68_P11518045	Lgals3	-6204
A_68_P09582304	mmu-mir-22	-4068
A_68_P06222810	Atf5	-2349
A_68_P14072681	Dtna	-225
A_68_P07854376	Ccrl2	-209
A_68_P10333534	9030617O03Rik	-140
A_68_P05553667	Rarres2	63
A_68_P07864839	Gup1	170
A_68_P09700946	Gfap	240
A_68_P02454024	Mtmr11	717
A_68_P11872900	Polr3h	911
A_68_P13581689	Atp6v0c	964
A_68_P07800432	1500010M16Rik	1098
A_68_P07607678	Dag1	1410
A_68_P12379099	Tbc1d22a	-7627
A_68_P11573347	Rnase13	-7447
A_68_P05278644	Atoh8	-7439
A_68_P12379248	chr15:083520442-083520489	-7295
A_68_P12379246	chr15:083520255-083520304	-7109
A_68_P01260154	Zfp313	-7013
A_68_P01396785	Lbp	-6962
A_68_P11742889	Rnase13	-6955
A_68_P06270429	4632411J06Rik	-6944
A_68_P09895827	Pnma1	-6691
A_68_P04552274	Camkk2	-6637
A_68_P12932221	Osbpl11	-6533
A_68_P09636568	Kcnip1	-6398
A_68_P02164235	Ppp1r16b	-6375
A_68_P01785949	Cdk9-Sh2d3c	-6312
A_68_P08673158	D10Wsu102e	-6205
A_68_P06749362	Efcbp2	-6138
A_68_P01860770	Slc30a4	-6048
A_68_P14468850	Slc22a12	-5763
A_68_P12739339	chr16:010127491-010127546	-5667
A_68_P02990459	chr3:010084385-010084445	-5560
A_68_P13867090	Pard6g	-5541
A_68_P03705253	Rprc1-Trappc3	-5418
A_68_P01092822	Fmo1	-4865
A_68_P04346888	Ppp2r2c	-4865
A_68_P09693784	Fdxr	-4573
A_68_P10185183	Crip1	-4243
A_68_P06221701	Bag3	-4173
A_68_P10509312	E230025K15	-4119
A_68_P02137418	Elmo2	-4106
A_68_P08747197	Col6a1	-4039
A_68_P06341516	1600014C10Rik	-3828
A_68_P03931817	chr4:136559427-136559472	-3526
A_68_P12452838	Pim3	-3456
A_68_P05893701	6330512M04Rik	-3208
A_68_P07707871	4933412E14Rik	-3101
A_68_P06833358	Gpr56	-2974
A_68_P06661195	R74862	-2859
A_68_P12308678	chr15:073754879-073754925	-2781
A_68_P01034995	Gpr37l1	-2640
A_68_P05931980	Rlbp1-BC025462	-2535
A_68_P09042930	BC010462	-2200
A_68_P02397316	Postn	-2117
A_68_P03450704	Mxra8	-2030
A_68_P04518724	Ubc	-1982
A_68_P09414265	Helz	-1973
A_68_P09974112	Bdkrb1	-1885
A_68_P12059696	Gpd1	-1722
A_68_P11249669	Il17rb	-1481
A_68_P06292558	Inpp5a	-1271
A_68_P05365484	C1galt1	-1261
A_68_P08702338	Hcn2	-1222
A_68_P11937879	BC030396	-1044
A_68_P13411234	Atp6v1e2	-801
A_68_P09319166	Tmem100	-699
A_68_P04403090	Slc2a9	-626
A_68_P07827385	2900042E01Rik	-598
A_68_P11497679	Olfr750	-591
A_68_P05653925	Pot1	-557
A_68_P01572878	Pkig	-380
A_68_P09623062	Cbr2	-347
A_68_P02820908	Dcamkl2	-310
A_68_P10190670	Msgn1	-269
A_68_P11632571	Zfp395	-234
A_68_P00216166	1500015O10Rik	-78
A_68_P12871584	chr16:042118943-042119003	-33
A_68_P08096801	AB124611	29
A_68_P13631574	chr18:035963996-035964043	126
A_68_P09012928	Hils1	292
A_68_P07827383	2900042E01Rik	300
A_68_P09745106	9630041N07Rik	305
A_68_P01772350	Lcn12	312
A_68_P06523791	Zfp94	342
A_68_P01784541	AY702102	354
A_68_P01343295	6330583M11Rik	362
A_68_P02927902	BC002199	391
A_68_P09504059	Kif1c	462
A_68_P01362000	Pdcl	485
A_68_P00867352	Dbi	584
A_68_P07308041	2410018C20Rik	599
A_68_P01741717	Vps18	605
A_68_P03651216	Acot11	658
A_68_P11865068	Gpd1	686
A_68_P03458654	1110029E03Rik	804
A_68_P02904358	Kcna3	850
A_68_P09926890	2810002I04Rik	874
A_68_P05740640	Tmem43	958
A_68_P08419145	Apc2	979
A_68_P14650157	Ocrl	1028
A_68_P08413994	Ckap4	1071
A_68_P13327863	Zfp161	1074
A_68_P11040896	Peci	1095
A_68_P07034955	Lphn1	1123
A_68_P07281382	Tm2d2	1136
A_68_P13877544	Pdgfrb	1175
A_68_P07786210	1300017J02Rik	1272
A_68_P04130731	Pscd3	1287
A_68_P02504542	Zfp697	1288
A_68_P10912119	Hexb	1345
A_68_P08007769	Sidt2	1350
A_68_P07931536	2310046O06Rik	1394
A_68_P09113070	Sgcd	1426
A_68_P06262488	Prkcdbp	1437
A_68_P01612754	Brrn1	1563
A_68_P02599086	4930503B20Rik	1583
A_68_P09177374	Wdr79	1620
A_68_P12041572	C230021P08Rik	1621
A_68_P09394559	Actg1	1636
A_68_P12979094	2610001E17Rik	1663
A_68_P05193196	Bhlhb2	1732
A_68_P02556727	Csf1	1736
A_68_P10254185	Egln3	1738
A_68_P08645665	Dot1l	1741
A_68_P02163640	2810003C17Rik	1750
A_68_P04942293	Aldh2	1779
A_68_P00247643	chr1:055525681-055525741	1795
A_68_P11055555	Shc3	1798
A_68_P00872357	Zbtb41	1846
A_68_P02504553	Zfp697	1861
A_68_P07800437	1500010M16Rik	1870
A_68_P09378071	Pfn1	1879
A_68_P06048161	Pak4	1883
A_68_P13078636	Daam2	1906
A_68_P01313060	Slc35c1	1942
A_68_P05402093	Slc6a11	1953
A_68_P06779384	Gpr56	1961
A_68_P13293578	1700012G19Rik	1985
A_68_P14292638	Ehd1	1985
A_68_P05183654	Ruvbl1	-7884
A_68_P06342029	Sbk1	-6407
A_68_P13483639	Tjap1-Egfl9	-5220
A_68_P09269155	Ovca2	-4031
A_68_P03064507	Cttnbp2nl	-2126
A_68_P01735828	Serping1	-247
A_68_P13367487	Trim26	-107
A_68_P03581085	Tnfsf15	-22
A_68_P04159066	Klhl5	178
A_68_P11025279	Elmo1	207
A_68_P06342030	Sbk1	-6153
A_68_P01556667	Fsip1	-6036
A_68_P11949211	chr15:057915234-057915294	-6019
A_68_P01935105	Trp53inp2	-1559
A_68_P06685702	Efcbp2	-1500
A_68_P12390812	Ptp4a3	-1042
A_68_P04723030	Hod	332
Hypermethylated
Probe name	GeneSymbol	Pos	E14.5NPCs	Astrocytes
A_68_P11843695	Kcnj4-Kdelr3	-7595
A_68_P11499855	Zfp312	-5007
A_68_P15086158	Bcor	-4700
A_68_P00327181	mmu-mir-135b	-2471
A_68_P06024742	Ctbp2	-1891
A_68_P10666960	Jarid2	-1443
A_68_P07829218	Pknox2	-1125
A_68_P08334920	Ascl1	-7893
A_68_P07026831	Glt25d1	-7095
A_68_P11843685	Kcnj4-Kdelr3	-6992
A_68_P08166788	Coro2b	-6723
A_68_P01625140	chr2:105367836-105367892	-5801
A_68_P04617651	Ncor2	-5790
A_68_P09671123	Socs3	-5473
A_68_P00992012	mmu-mir-135b	-5184
A_68_P03009939	Anxa5	-5101
A_68_P03954973	Eno1	-4950
A_68_P13671847	Pcdhgb8	-4916
A_68_P14483477	Emx2	-4670
A_68_P08099693	Hnt	-4647
A_68_P12793056	mmu-mir-365-1	-4195
A_68_P09323065	Emid1	-3559
A_68_P14463314	Fgf8	-3353
A_68_P09572214	4930430E16Rik	-3327
A_68_P09628721	Meis1	-3136
A_68_P13722592	Zfp532	-3063
A_68_P11746907	Zfp503	-2912
A_68_P14125840	Pcdhga11	-2844
A_68_P00993107	mmu-mir-135b	-2810
A_68_P02202685	Insm1	-2700
A_68_P12947299	Hes1	-2503
A_68_P03160430	Mab21l1	-2438
A_68_P02379914	Crabp2	-2281
A_68_P05808766	Bhlhb2	-1967
A_68_P10169788	mmu-mir-203	-1881
A_68_P06388931	chr7:136991886-136991943	-1879
A_68_P03160463	Mab21l1	-1803
A_68_P13696857	Fbn2	-1778
A_68_P08616846	Hey2	-1761
A_68_P07324810	Hsd11b2	-1610
A_68_P02312547	Ptgfrn	-1581
A_68_P13687379	Tnfaip8	-1572
A_68_P07038628	Plekha2	-1566
A_68_P07351959	D230002A01Rik	-1516
A_68_P11848143	Bai1	-1512
A_68_P13522497	Foxp4	-1485
A_68_P13909021	Pmaip1	-1358
A_68_P11739190	Neil2	-1325
A_68_P14149983	Tle4	-1324
A_68_P05473162	chr6:119977810-119977859	-1289
A_68_P01887581	Shc4	-1272
A_68_P06269776	Fzd4	-1174
A_68_P12184846	Mtss1	-1143
A_68_P07351958	D230002A01Rik	-1135
A_68_P12318109	Tmem16f	-1079
A_68_P05473158	chr6:119977470-119977530	-955
A_68_P12150006	Kif21a	-899
A_68_P14143571	Nkx2-3	-883
A_68_P01137509	Niban	-829
A_68_P05473160	chr6:119977328-119977387	-812
A_68_P14367150	Slit1	-744
A_68_P05629718	Gprc5a	-728
A_68_P05375538	Eif4e3	-708
A_68_P05492563	mmu-mir-200c	-695
A_68_P02025412	Ntng2	-592
A_68_P07856673	Trak1	-557
A_68_P01524597	Hspa12b	-485
A_68_P13310860	Plekhh2	-439
A_68_P01142769	Hs6st1	-372
A_68_P07890306	Axud1	-332
A_68_P06431984	Doc2a	-187
A_68_P06948704	BC016201	47
A_68_P11514787	4931414P19Rik	227
A_68_P13196755	Grm4	276
A_68_P05115632	Lrrc4	490
A_68_P00840024	Susd4	692
A_68_P08628720	4632428N05Rik	771
A_68_P02376968	Gipc2	810
A_68_P02301823	Tpd52	851
A_68_P09655128	Emid1	889
A_68_P10974751	Prr7	1096
A_68_P11875449	Scx	1096
A_68_P03990271	Adc	1147
A_68_P08486355	Lrrtm3	1191
A_68_P07187470	Rbpms	1205
A_68_P02221142	Alx4	1264
A_68_P09356069	D11Bwg0517e	1289
A_68_P13903090	Pcdhgc5	1317
A_68_P11212354	Il17rd	1337
A_68_P01489929	Pcgf4	1371
A_68_P02561233	Nexn	1431
A_68_P08384244	9030612E09Rik	1482
A_68_P13130716	Cacna1h	1484
A_68_P03160390	Mab21l1	1538
A_68_P02036661	Snai1	1695
A_68_P12933839	Tbx1	1710
A_68_P13903071	Pcdhgc5	1787
A_68_P14498423	Prkg1	1798
A_68_P09057489	Cbx8	1853
A_68_P09341127	Hand1	1927
A_68_P07174228	Ndrg4	-7839
A_68_P03423646	3110024A21Rik	-7728
A_68_P05039311	Gata2	-7713
A_68_P02226170	Chst1	-7498
A_68_P03568707	Hes5	-7260
A_68_P08742920	Tle2	-6814
A_68_P01625139	chr2:105367062-105367122	-6573
A_68_P03954968	Eno1	-5714
A_68_P06623119	Zfp536	-5479
A_68_P06284479	Ldha	-5214
A_68_P03260048	Fblim1	-5082
A_68_P14532077	Sox3	-4914
A_68_P07827942	Tbx20	-4829
A_68_P10221529	Frmd6	-4666
A_68_P09370376	Cbx8	-4445
A_68_P00936375	Lhx9	-3788
A_68_P10767973	Foxc1	-3661
A_68_P05987512	Nkx1-2-2310007H09Rik	-3319
A_68_P11544003	Sox7	-3254
A_68_P05285119	MGC107514	-3190
A_68_P10767975	Foxc1	-3150
A_68_P00214991	Aff3	-3084
A_68_P02581370	Wnt2b	-2193
A_68_P14098015	Nfatc1	-2143
A_68_P03135772	Mab21l2	-1960
A_68_P09134703	Col1a1	-1733
A_68_P10067254	Pnma1	-1700
A_68_P09344263	2810410L24Rik	-1680
A_68_P05346565	Podxl	-1561
A_68_P01424449	Tbr1	-1532
A_68_P11342719	Sox7	-1410
A_68_P14179573	Lrp5	-1390
A_68_P14586192	Irs4	-1389
A_68_P08474950	Mtap7	-1022
A_68_P03303259	Errfi1	-992
A_68_P08066244	Slc38a3	-901
A_68_P09485731	Tbx4	-859
A_68_P09448685	2210403B10Rik	-855
A_68_P08888274	Cd63	-824
A_68_P13909014	Pmaip1	-758
A_68_P11948517	Aqp5	-751
A_68_P12255150	Bai1	-743
A_68_P09077689	Trim7	-467
A_68_P02979839	9930117H01Rik	-341
A_68_P09105602	Hand1	-313
A_68_P04986396	Gsh2	-265
A_68_P03856552	Mobkl2b	-129
A_68_P02014879	mmu-mir-219-2	-76
A_68_P05115620	Lrrc4	71
A_68_P03545862	Plekhg5	232
A_68_P01881427	C230071H18Rik	501
A_68_P12933823	Tbx1	633
A_68_P06867909	Slc5a5	642
A_68_P14605117	1700045I19Rik	681
A_68_P04238971	Kcnh2	825
A_68_P02556317	Kcnc4	888
A_68_P14337486	Nrxn2	890
A_68_P01584449	Gata3	915
A_68_P00258739	5330438I03Rik	955
A_68_P14429653	Pitx3	970
A_68_P09460005	Tbx2	1022
A_68_P09330627	Kcnab3	1147
A_68_P14181866	2700081O15Rik	1225
A_68_P06592484	Wnt11	1413
A_68_P09330617	Kcnab3	1498
A_68_P13240995	Dll1	1725
A_68_P03301122	Galnt12	1744
A_68_P05962851	Utf1	1744
A_68_P09572719	Rnd2	1821
A_68_P00332096	Prrx1	1911
A_68_P04918911	4930471M23Rik	-4337
A_68_P11113946	Atg10	-3338
A_68_P00439150	Ap1s3	-1359
A_68_P09344278	2810410L24Rik	-1075
A_68_P03602832	Mrps15	-934
A_68_P04480991	Wfs1	-766
A_68_P01823709	Nphp1	-108
A_68_P10745919	Ipo11	714
