# Supplementary material for: Astrocyte-Specific Genes Are Generally Demethylated in Neural Precursor Cells Prior to Astrocytic Differentiation
Source: PLoS One. 2008 Sep 11;3(9):e3189. doi: 10.1371/journal.pone.0003189 (PMC2527128; doi:10.1371/journal.pone.0003189)
Supplement: Table S3 — List of primers and restriction enzymes used for COBRA and bisulfite sequencing analysis. (0.02 MB XLS) [file pone.0003189.s003.xls]

## Sheet: Sheet1
Fig. 1
Primer name	Primer Sequence
Gfap-B3	GATTTGGTAGTGTTGAGTTGGTTAGT
Gfap-B4	TTTTATCCCAAAATACCAAAATATCA
Stat3Pro-B1	TTTAGGGAGGTGTGTTTAGAGTTTT
Stat3Pro-B2	CAAATTCCCCCTCCCTATCTACACTAC
Fig. 3B
Primer name	Primer Sequence
Padi2-B1	GAGTAGAGTATTTGGTAGAGGAGGT
Padi2-B2	CACAACTATTAATAAATTAAAATCC
Kcnj10-B1	GTTTTTTGTTTGGGGTTATATGG
Kcnj10-B2	ATCCCCATACTCAATCTACCCTCC
Aldoc-B1	TTTTTTGTTGAGTAGAAGAAGGAGTT
Aldoc-B2	TCATCAACACTAAATAAAACCTAAC
Tnfsf13-B1	TTTGGGAAGGGGTTTAGAATTAG
Tnfsf13-B2	ACAAAATACTAAAATTAAAACTAATCC
Gfap-B1	TTGAGTTGGGAGTTTGTATTGTATT
Gfap-B2	ATTCCTACACACCAAACCTCTAAAA
Sox8-B6	GTTTTGGGTAGAAGTTGGGATTT
Sox8-B7	AAATTATCCTCAAAACACACACACA
Serpinb8-B1	TTTTGAGGATGTATGTTAAAAGTTAGGT
Serpinb8-B4	TCAATACCAATATCTATCCTAAACCC
Sox3-B1	GAGTAATTTTTAGAAATTTGGTTTT
Sox3-B2	AATCTAATAAACTCCTACTCACCCC
